# Supplementary material
Source: HighWire-hosted journal article supplement (https://bmjopen.bmj.com/content/14/6/e083456)
Supplement: inline-supplementary-material-1 [file inline-supplementary-material-1.pdf]

Supplements

Table S1 Characteristics of ACS inpatients who underwent PCI

| Characteristics and medication                        | Postpolicy<br>(n=8982) | Prepolicy<br>(n=22778) | Student's<br>t/ $\chi^2$ | p<br>value |
|-------------------------------------------------------|------------------------|------------------------|--------------------------|------------|
| Diagnostic classification                             |                        |                        |                          |            |
| Unstable angina pectoris                              | 3933(43.79%)           | 9691(42.55%)           |                          |            |
| Non-ST-segment elevation MI                           | 2054(22.87%)           | 5351(23.49%)           | 4.61                     | 0.2026     |
| ST-segment elevation MI                               | 2966(33.02%)           | 7649(33.58%)           |                          |            |
| Undetermined                                          | 29(0.32%)              | 87(0.38%)              |                          |            |
| Age, years <sup>†</sup>                               | 65.03 (11.61)          | 65.52 (11.52)          | 4.28                     | <.0001     |
| Age group, years                                      |                        |                        |                          |            |
| <50                                                   | 925 (10.30%)           | 2097 (9.21%)           |                          |            |
| 50-59                                                 | 1587 (17.67%)          | 4082 (17.92%)          |                          |            |
| 60-69                                                 | 3209 (35.73%)          | 8323 (36.54%)          | 28.56                    | <.0001     |
| 70-79                                                 | 2343 (26.09%)          | 5600 (24.59%)          |                          |            |
| ≥80                                                   | 918 (10.21%)           | 2676 (11.74%)          |                          |            |
| Sex                                                   |                        |                        |                          |            |
| Male                                                  | 6786 (75.55%)          | 17223 (75.60%)         | 0.01                     | 0.9038     |
| Female                                                | 2196 (24.45%)          | 5555 (24.39%)          |                          |            |
| Medical insurance                                     |                        |                        |                          |            |
| Yes                                                   | 7935 (88.34%)          | 20310 (89.16%)         |                          |            |
| No                                                    | 1047 (11.66%)          | 2468 (10.84%)          | 4.42                     | 0.0356     |
| Medical history                                       |                        |                        |                          |            |
| Diabetes                                              | 2783 (30.98%)          | 7511 (32.97%)          | 11.65                    | 0.0006     |
| Hypertension                                          | 5271 (58.68%)          | 14451 (63.44%)         | 61.98                    | <.0001     |
| Hyperlipidaemia                                       | 2742 (30.53%)          | 76.38 (33.53%)         | 26.43                    | <.0001     |
| Stroke                                                | 81 (0.90%)             | 265 (1.16%)            | 4.09                     | 0.0431     |
| Chronic kidney disease                                | 844 (9.40%)            | 2391 (10.50%)          | 8.53                     | 0.0035     |
| Chronic obstructive pulmonary disease                 | 251 (2.79%)            | 764 (3.35%)            | 6.52                     | 0.0107     |
| Previous MI                                           | 646 (7.19%)            | 2028 (8.90%)           | 24.46                    | <.0001     |
| Previous CABG                                         | 264 (2.94%)            | 1002 (4.40%)           | 35.87                    | <.0001     |
| Hospital level                                        |                        |                        |                          |            |
| Tertiary hospital                                     | 7984 (88.89%)          | 20788 (91.26%)         | 42.62                    | <.0001     |
| Secondary hospital                                    | 998 (11.11%)           | 1990 (8.74%)           |                          |            |
| NYHA or Killip functional classification <sup>‡</sup> |                        |                        |                          |            |
| I                                                     | 2492 (60.59%)          | 4350 (55.68%)          |                          |            |
| II or III                                             | 1499 (36.45%)          | 3283 (42.03%)          | 37.08                    | <.0001     |
| IV                                                    | 122 (2.96%)            | 179 (2.29%)            |                          |            |
| Number of coronary stents implanted <sup>‡</sup>      |                        |                        |                          |            |
| 1                                                     | 4244 (73.96%)          | 7897 (74.36%)          |                          |            |
| 2                                                     | 1134 (19.76%)          | 2257 (21.25%)          | 35.57                    | <.0001     |
| 3                                                     | 290 (5.05%)            | 402 (3.79%)            |                          |            |
| 4 or more                                             | 70 (1.22%)             | 66 (0.60%)             |                          |            |

| Characteristics and medication                                       | Postpolicy<br>(n=8982) | Prepolicy<br>(n=22778) | Student's<br>t/ $\chi^2$ | p<br>value |
|----------------------------------------------------------------------|------------------------|------------------------|--------------------------|------------|
| At least one bid-winning stent <sup>‡</sup>                          |                        |                        |                          |            |
| Yes                                                                  | 6086 (86.52%)          | 8950 (55.67%)          | 2049.02                  | <.0001     |
| No                                                                   | 948 (13.48%)           | 7127 (44.33%)          |                          |            |
| Medication prescribed at outpatient visits during the year after PCI |                        |                        |                          |            |
| Aspirin                                                              | 6255 (69.64%)          | 15739 (69.10)          | 0.89                     | 0.3459     |
| Clopidogrel                                                          | 4691 (52.23%)          | 12246 (53.76)          | 6.10                     | 0.0135     |
| Metoprolol                                                           | 4777 (53.18%)          | 13051 (57.30)          | 44.24                    | <.0001     |
| Ticagrelor                                                           | 4037 (44.95%)          | 11365 (49.89)          | 63.17                    | <.0001     |
| Atorvastatin                                                         | 5392 (60.03%)          | 14113 (61.96)          | 10.10                    | 0.0015     |
| Ezetimibe                                                            | 1556 (17.32%)          | 2799 (12.29)           | 138.04                   | <.0001     |
| Sacubitril/valsartan                                                 | 2342 (26.07%)          | 2210 (9.70)            | 1406.29                  | <.0001     |
| Trimetazidine dihydrochloride                                        | 443 (4.93%)            | 1918 (8.42)            | 113.91                   | <.0001     |
| Pravastatin sodium                                                   | 750 (8.35%)            | 2387 (10.48)           | 32.81                    | <.0001     |
| Nicorandil                                                           | 502 (5.59%)            | 694 (3.05)             | 114.86                   | <.0001     |
| Isosorbide dinitrate                                                 | 1409 (15.69%)          | 4260 (18.70)           | 39.94                    | <.0001     |
| Rosuvastatin                                                         | 2296 (25.56%)          | 4495 (19.73)           | 130.17                   | <.0001     |
| Others                                                               | 541(6.02%)             | 1175 (5.16)            | 9.42                     | 0.0021     |

† Age is presented as the mean (SD) and was compared between post- and prepolicy cohorts by Student's t test; all other variables and age groups are presented as n (%) and were compared between the post- and prepolicy cohorts by the  $\chi^2$  test.

‡ There were missing data for these variables.

Table S2 Characteristics of the two PS-matched cohorts

| Characteristics                                       | Postpolicy<br>(n=4098) | Prepolicy<br>(n=4098) | Student's<br>t/ $\chi^2$ | p value |
|-------------------------------------------------------|------------------------|-----------------------|--------------------------|---------|
| Age, years <sup>†</sup>                               | 64.49 (12.01)          | 64.48 (12.02)         | -0.05                    | 0.9597  |
| Age group, years                                      |                        |                       |                          |         |
| <60                                                   | 1261 (30.77%)          | 1260 (30.75%)         | 0.05                     | 0.9746  |
| 60-69                                                 | 1424 (34.75%)          | 1433 (34.97%)         |                          |         |
| ≥70                                                   | 1413 (34.48%)          | 1405 (34.29%)         |                          |         |
| Sex                                                   |                        |                       |                          |         |
| Male                                                  | 3173 (77.43%)          | 3173(77.43%)          | 0.00                     | 1.0000  |
| Female                                                | 925 (22.57%)           | 925 (22.57%)          |                          |         |
| Medical insurance                                     |                        |                       |                          |         |
| Yes                                                   | 3588 (87.55%)          | 3591 (87.63%)         | 0.01                     | 0.9199  |
| No                                                    | 510 (12.45%)           | 507 (12.37%)          |                          |         |
| Previous medical history                              |                        |                       |                          |         |
| Diabetes                                              | 1216 (29.67%)          | 1216 (29.67%)         | 0.00                     | 1.0000  |
| Hypertension                                          | 2329 (56.83%)          | 2329 (56.83%)         | 0.00                     | 1.0000  |
| CABG                                                  | 86 (2.10%)             | 86 (2.10%)            | 0.00                     | 1.0000  |
| Hospital level                                        |                        |                       |                          |         |
| Tertiary hospital                                     | 3588 (87.55%)          | 3588 (87.55%)         | 0.00                     | 1.0000  |
| Secondary hospital                                    | 1225 (7.29%)           | 1461 (6.41%)          |                          |         |
| Severity of heart function                            |                        |                       |                          |         |
| NYHA or Killip functional classification<br>at IV     | 108 (2.64%)            | 108 (2.64%)           | 0.00                     | 1.0000  |
| NYHA or Killip functional classification<br>not at IV | 3990 (97.36%)          | 3990 (97.36%)         |                          |         |

<sup>†</sup> Age is presented as the mean (SD) and was compared between the post- and prepolicy cohorts by Student's t test; all other variables and age groups are presented as n (%) and were compared between the post- and prepolicy cohorts by the  $\chi^2$  test.

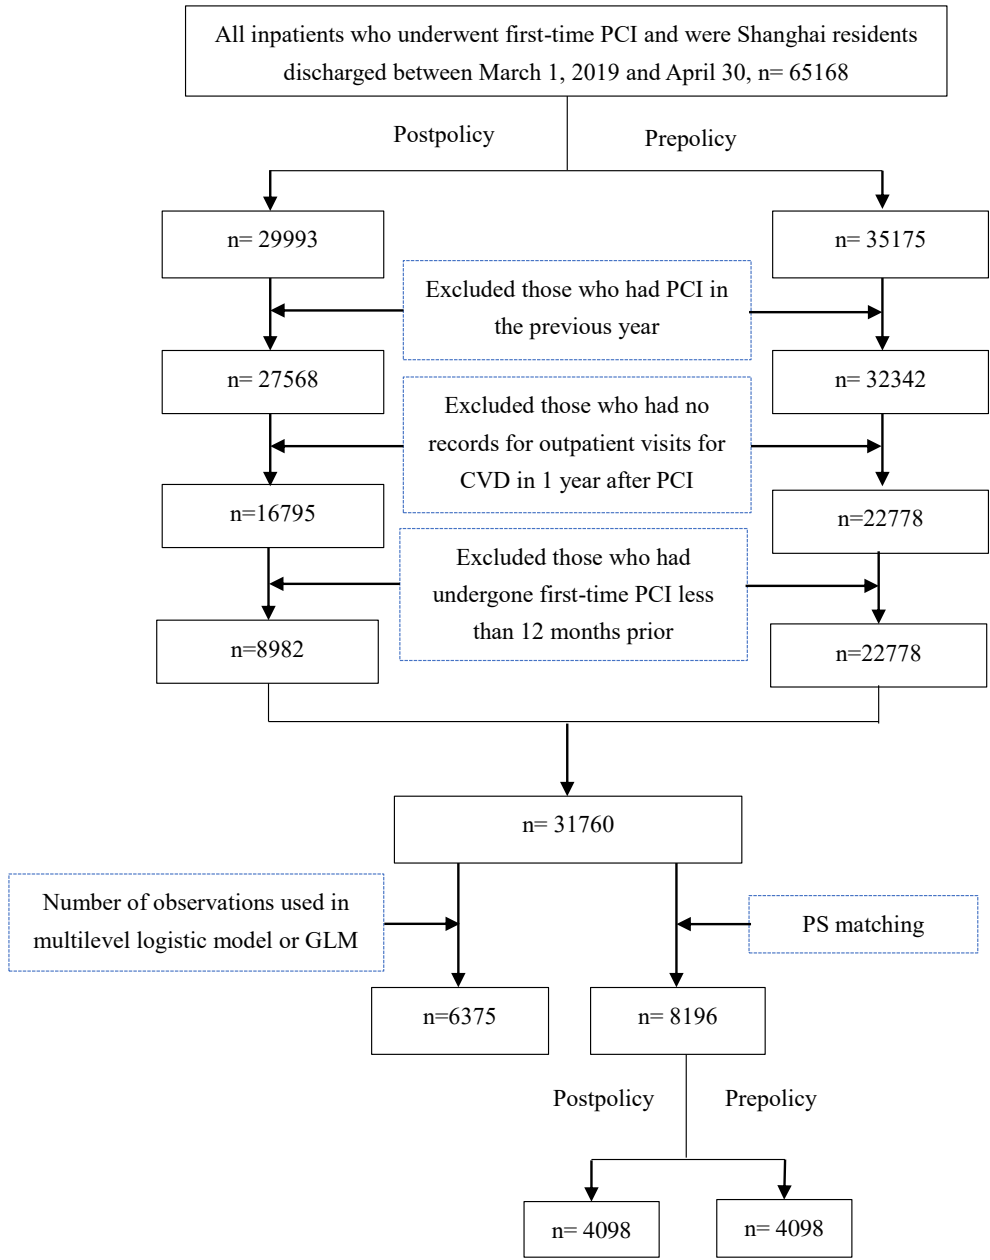

Figure S1 Data screening process used in the study

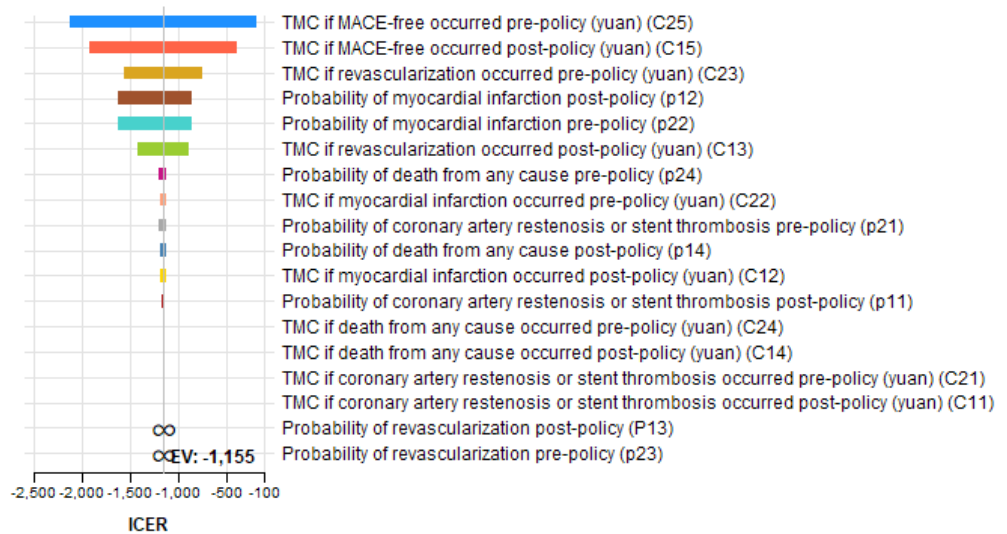

A. Based on real-world data †

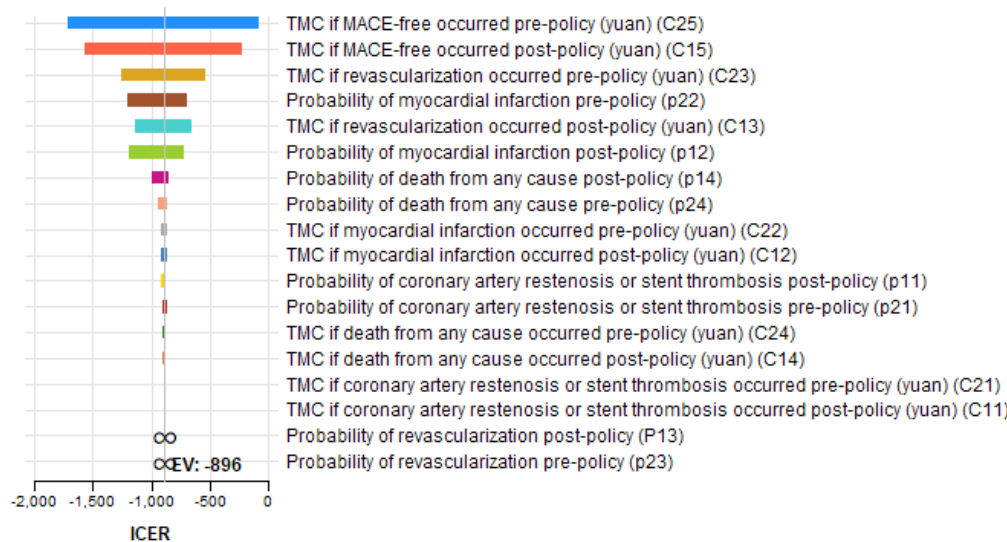

B. Based on PS-matched data †

† TMC: total medical costs

Figure S2 Tornado diagram: ICER (postpolicy vs. prepolicy)

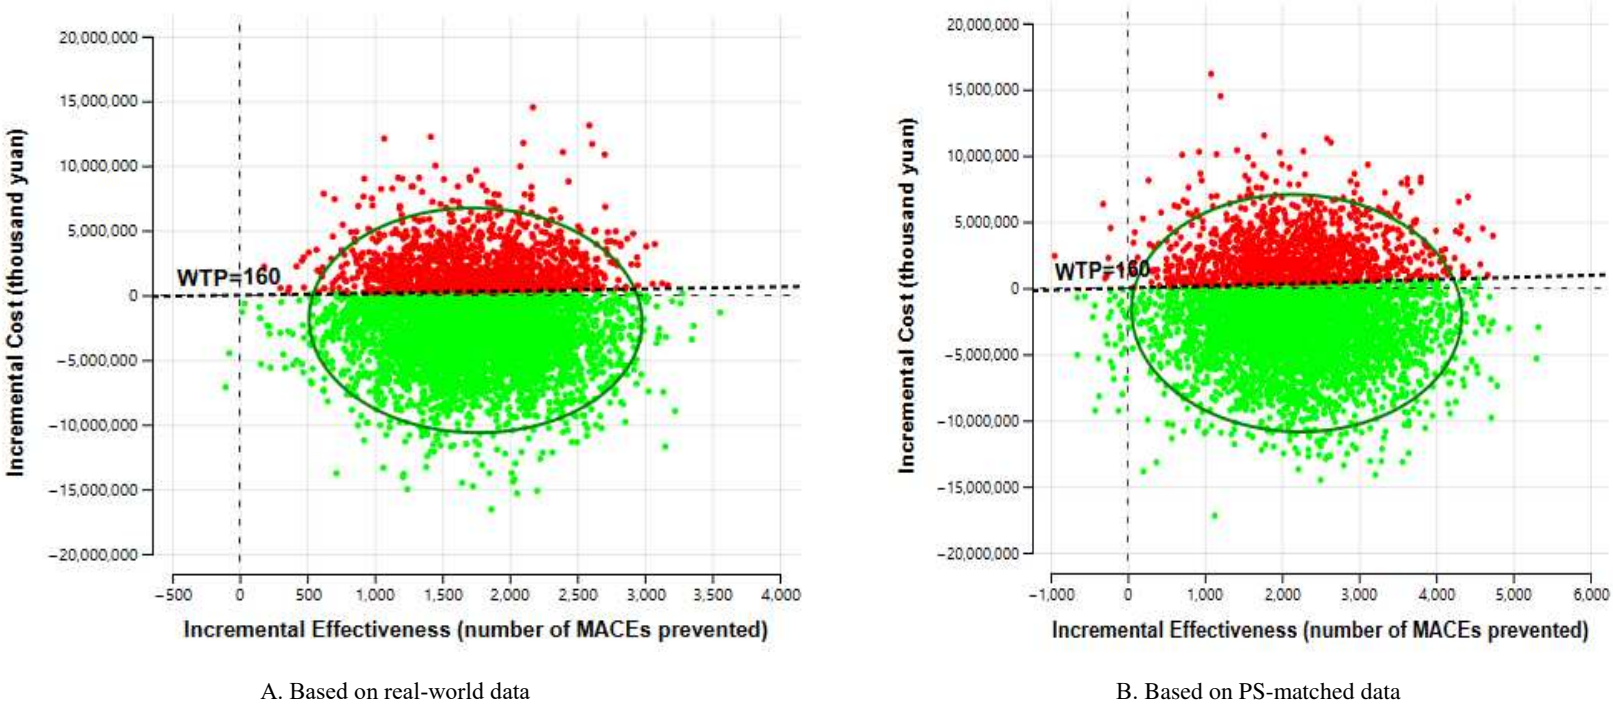

Fig. S3 ICE scatterplot (postpolicy vs. prepolicy)

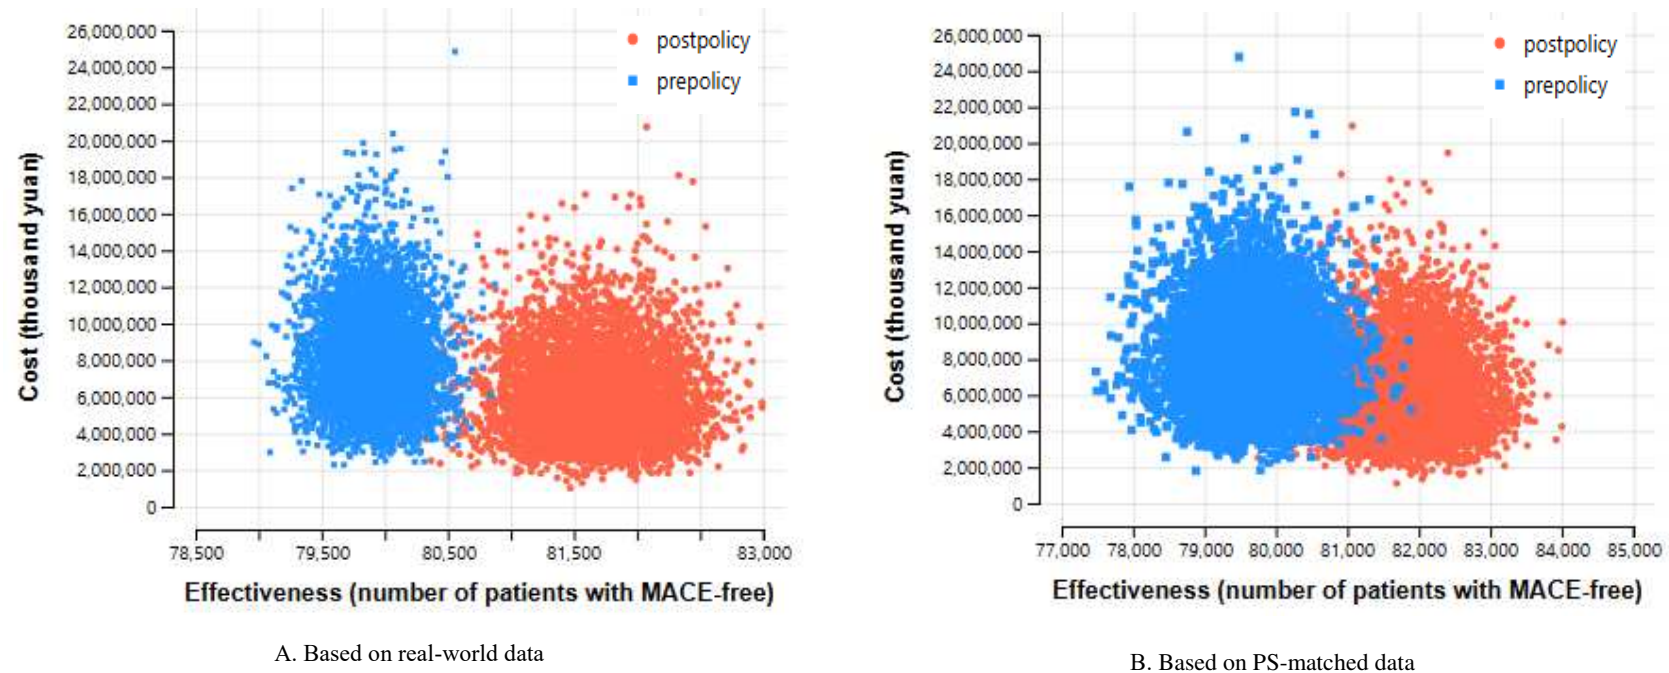

Figure S4 Cost-effectiveness scatterplot (postpolicy vs. prepolicy)
